# Supplementary material for: Urea Fertilization Significantly Promotes Nitrous Oxide Emissions from Agricultural Soils and Is Attributed to the Short-Term Suppression of Nitrite-Oxidizing Bacteria during Urea Hydrolysis
Source: MDPI journal article supplement (doi:10.3390/microorganisms12040685), 2024-03-28
Supplement: s1 [file s1]

**Table S1.** Characteristics of the four soils tested in the study. The value in the parenthesis stands for the standard deviation obtained for 3 replicates.

| Soil name | Soil texture class <sup>①</sup> | Bulk density (g cm <sup>-3</sup> ) <sup>②</sup> | Water content (w/w) <sup>③</sup> | pH <sup>④</sup> | Initial N-NH <sub>4</sub> <sup>+</sup> <sup>⑤</sup> (μg N g <sup>-1</sup> soil) | Initial N-NO <sub>3</sub> <sup>-</sup> <sup>⑥</sup> (μg N g <sup>-1</sup> soil) | Total organic carbon content <sup>⑦</sup> |
|-----------|---------------------------------|-------------------------------------------------|----------------------------------|-----------------|---------------------------------------------------------------------------------|---------------------------------------------------------------------------------|-------------------------------------------|
| Solanum   | Sandy Loam                      | 1.26                                            | 0.23 (0.025)                     | 6.83 (0.02)     | 0.74 (0.08)                                                                     | 79.46 (0.97)                                                                    | 1.1% (0.08)                               |
| Lettuce   | Clay                            | 1.38                                            | 0.22 (0.013)                     | 5.25 (0.03)     | 0.94 (0.12)                                                                     | 54.08 (2.89)                                                                    | 1.4% (0.10)                               |
| Banana    | Sandy Loam                      | 1.29                                            | 0.18 (0.020)                     | 6.35 (0.03)     | 9.68 (0.22)                                                                     | 9.61(1.36)                                                                      | 2.0% (0.07)                               |
| Pitaya    | Clay                            | 1.30                                            | 0.29 (0.005)                     | 5.58(0.01)      | 12.36 (0.89)                                                                    | 12.05 (2.23)                                                                    | 2.3% (0.14)                               |

① SRUC, Craibstone, Scotland; grid reference NJ872104. ② Reference Kemp et al ( *Biol. Fert. Soils* **1992**, *13*(4), 218-224, doi: 10.1007/BF00340579). ③ Oven drying method. ④ Measured in 1:5 soil:1 M KCl extracts. ⑤ Indophenol Blue method, measured in 1:5 soil:2g L<sup>-1</sup> CaSO<sub>4</sub> extracts. ⑥ Ion chromatography, measured in 1:5 soil:2g L<sup>-1</sup> CaSO<sub>4</sub> extracts. ⑦ Reference standard HJ 501-2009.

**Table S2.** Soil pH after 0, 12, 24, 36, 48 and 72 hours of first microcosm experiment.

| Soil    | Applied Fertilizer (μg N g <sup>-1</sup> soil <sub>dw</sub> ) | pH   |      |      |      |      |      |
|---------|---------------------------------------------------------------|------|------|------|------|------|------|
|         |                                                               | 0 h  | 12 h | 24 h | 36 h | 48 h | 72 h |
| Solanum | NH <sub>4</sub> <sup>+</sup> -250                             | 6.70 | 6.58 | 6.43 | 6.30 | 6.13 | 5.76 |
|         | Urea-250                                                      | 6.85 | 7.14 | 7.22 | 7.07 | 6.78 | 6.15 |

Measured in 1:5 soil:1 M KCl extracts.

**Table S3.** Soil pH after 0, 3, 6 and 9 days of second microcosm experiment.

| Soil    | Applied Fertilizer (μg N g <sup>-1</sup> soil <sub>dw</sub> ) | pH     |        |        |        |
|---------|---------------------------------------------------------------|--------|--------|--------|--------|
|         |                                                               | 0 days | 3 days | 6 days | 9 days |
| Solanum | NH <sub>4</sub> <sup>+</sup> -100                             | 6.81   | 5.95   | 6.03   | 6.01   |
|         | NH <sub>4</sub> <sup>+</sup> -250                             | 6.70   | 5.76   | 5.48   | 5.46   |
|         | NH <sub>4</sub> <sup>+</sup> -450                             | 6.64   | 5.70   | 5.36   | 5.23   |
|         | Urea-100                                                      | 6.84   | 6.15   | 6.20   | 6.25   |
|         | Urea-250                                                      | 6.85   | 6.14   | 5.92   | 5.90   |
|         | Urea-450                                                      | 6.84   | 6.37   | 5.74   | 5.54   |

Measured in 1:5 soil:1 M KCl extracts.

**Table S4.** Soil pH after 0, 3, 6 and 9 days of third microcosm experiment.

| Soil    | Applied Fertilizer<br>( $\mu\text{g N g}^{-1} \text{ soil}_{\text{dw}}$ )          | pH     |        |        |        |
|---------|------------------------------------------------------------------------------------|--------|--------|--------|--------|
|         |                                                                                    | 0 days | 3 days | 6 days | 9 days |
| Solanum | $\text{NH}_4^+$ (CK)                                                               | 6.70   | 5.76   | 5.48   | 5.46   |
|         | $\text{NH}_4^+$ + 10 $\mu\text{g g}^{-1} \text{ soil}_{\text{dw}}$ $\text{KClO}_3$ | 6.70   | 6.41   | 6.10   | 6.01   |
|         | $\text{NH}_4^+$ + 30 $\mu\text{g g}^{-1} \text{ soil}_{\text{dw}}$ $\text{KClO}_3$ | 6.70   | 6.45   | 6.19   | 6.05   |
|         | Urea (CK)                                                                          | 6.85   | 6.14   | 5.92   | 5.90   |
|         | Urea + 6.4 $\mu\text{g g}^{-1} \text{ soil}_{\text{dw}}$ NBPT                      | 6.85   | 6.12   | 5.93   | 5.87   |
|         | Urea + 12.8 $\mu\text{g g}^{-1} \text{ soil}_{\text{dw}}$ NBPT                     | 6.85   | 6.21   | 6.08   | 5.90   |

Measured in 1:5 soil:1 M KCl extracts.

**Table S5.** Nitrite oxidation potential after 3, 12, 24, 48 hours of the incubation of FA.

| Soil    | Ammonia in<br>head-space (v/v) | Nitrite oxidation potential<br>( $\mu\text{mol g}^{-1} \text{ soil}_{\text{dw}} \text{ h}^{-1}$ ) |                     |                     |                     |
|---------|--------------------------------|---------------------------------------------------------------------------------------------------|---------------------|---------------------|---------------------|
|         |                                | 3h                                                                                                | 12h                 | 24h                 | 48h                 |
| Solanum | CK                             | 0.248 <sup>aa</sup>                                                                               | 0.253 <sup>aa</sup> | 0.257 <sup>aa</sup> | 0.256 <sup>aa</sup> |
|         | 0.9%                           | 0.238 <sup>aa</sup>                                                                               | 0.215 <sup>bb</sup> | 0.206 <sup>cb</sup> | 0.192 <sup>db</sup> |
|         | 2.7%                           | 0.236 <sup>aa</sup>                                                                               | 0.209 <sup>bb</sup> | 0.190 <sup>bc</sup> | 0.120 <sup>cc</sup> |
|         | 4.5%                           | 0.224 <sup>ab</sup>                                                                               | 0.192 <sup>bc</sup> | 0.164 <sup>cd</sup> | 0.105 <sup>dc</sup> |
| Lettuce | CK                             | 0.141 <sup>aa</sup>                                                                               | 0.145 <sup>aa</sup> | 0.140 <sup>aa</sup> | 0.134 <sup>aa</sup> |
|         | 0.9%                           | 0.140 <sup>aa</sup>                                                                               | 0.129 <sup>bb</sup> | 0.087 <sup>cb</sup> | 0.057 <sup>cb</sup> |
|         | 2.7%                           | 0.137 <sup>aa</sup>                                                                               | 0.123 <sup>bb</sup> | 0.062 <sup>cc</sup> | 0.025 <sup>cc</sup> |
|         | 4.5%                           | 0.132 <sup>aa</sup>                                                                               | 0.110 <sup>bc</sup> | 0.043 <sup>cc</sup> | 0.015 <sup>dc</sup> |
| Banana  | CK                             | 0.331 <sup>aa</sup>                                                                               | 0.330 <sup>aa</sup> | 0.334 <sup>aa</sup> | 0.331 <sup>aa</sup> |
|         | 0.9%                           | 0.331 <sup>aa</sup>                                                                               | 0.316 <sup>bb</sup> | 0.311 <sup>bb</sup> | 0.312 <sup>bb</sup> |
|         | 2.7%                           | 0.328 <sup>aa</sup>                                                                               | 0.311 <sup>bc</sup> | 0.282 <sup>cc</sup> | 0.268 <sup>cc</sup> |
|         | 4.5%                           | 0.325 <sup>aa</sup>                                                                               | 0.308 <sup>bc</sup> | 0.271 <sup>dc</sup> | 0.246 <sup>cd</sup> |
| Pitaya  | CK                             | 0.198 <sup>aa</sup>                                                                               | 0.192 <sup>aa</sup> | 0.194 <sup>aa</sup> | 0.197 <sup>aa</sup> |
|         | 0.9%                           | 0.194 <sup>aa</sup>                                                                               | 0.183 <sup>ba</sup> | 0.163 <sup>cb</sup> | 0.153 <sup>cb</sup> |
|         | 2.7%                           | 0.180 <sup>ab</sup>                                                                               | 0.156 <sup>bb</sup> | 0.124 <sup>cc</sup> | 0.109 <sup>dc</sup> |
|         | 4.5%                           | 0.180 <sup>ab</sup>                                                                               | 0.148 <sup>bb</sup> | 0.117 <sup>cc</sup> | 0.073 <sup>dd</sup> |

One-way ANVOD was performed using Duncan's method, with different first letters in the same row and different second letters in the same column indicating significant differences ( $p < 0.05$ ).

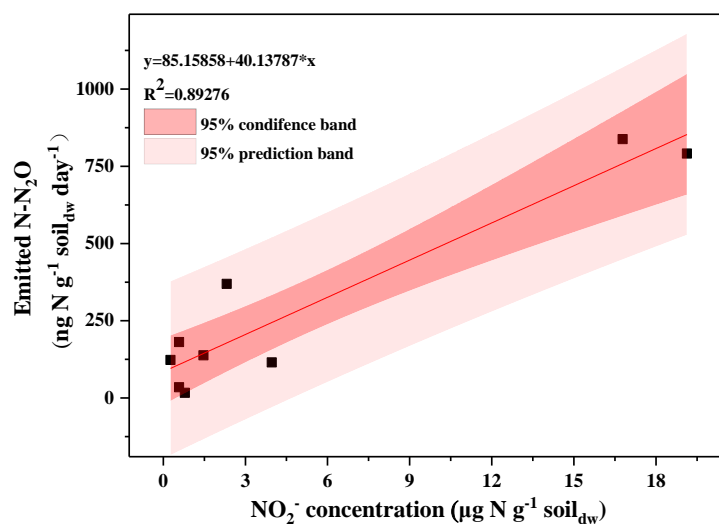

**Figure S1.** Correlation analysis between  $\text{N}_2\text{O}$  emission rate and  $\text{NO}_2^-$  concentration in microcosm experiment.

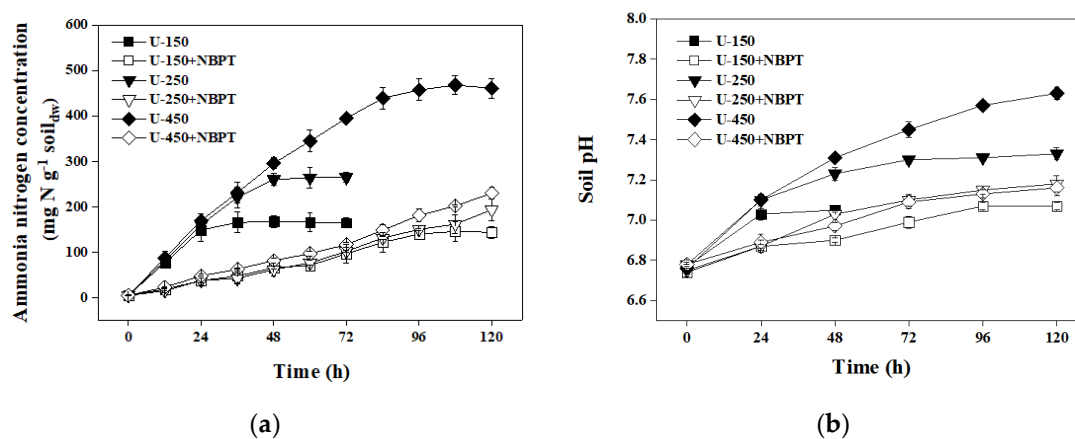

**Figure S2.** (a) Hydrolysis of urea; (b) changes of soil pH in microcosm. Hydrolysis reactions operated in soil microcosm with acetylene to inhibit AOM. The concentration of NBPT was  $6.4 \mu\text{g g}^{-1} \text{ soil}_{\text{dw}}$ .

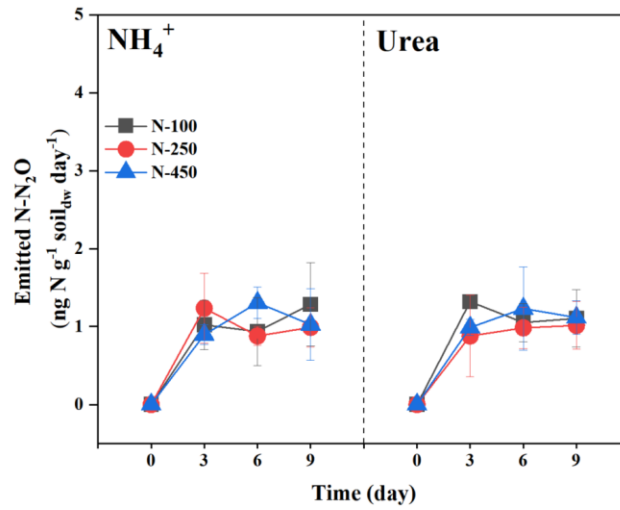

**Figure S3.** Changes of  $\text{N}_2\text{O}$  emission rate in second microcosm experiment with AOM inhibitor acetylene.

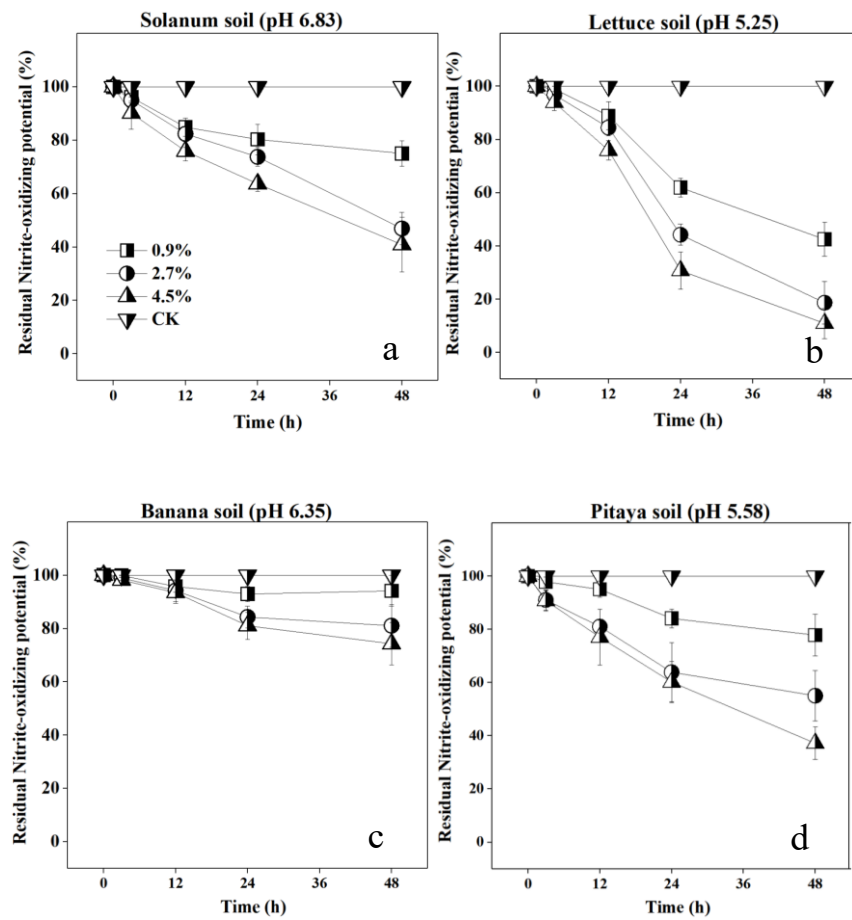

**Figure S4.** Time-series change of the residual nitrite-oxidizing potential in (a) solanum soil, (b) lettuce soil, (c) banana soils and (d) pitaya soil when responding to different concentration of FA. CK: without addition of FA.
